# Supplementary material
Source: publisher site journal article supplement (https://www.dovepress.com/article/287271)
Supplement: Supplementary file 1 [file get_supplementary_file.php]

## **SUPPLEMENTARY MATERIAL**

### **Acute Treatment of Migraine With Celecoxib Oral Solution: Results of a Randomized, Placebo-Controlled Clinical Trial**

Richard B. Lipton, MD<sup>1</sup>; Sagar Munjal, MD, MS<sup>2</sup>; David W. Dodick, MD<sup>3</sup>; Stewart J.  
Tepper, MD<sup>4</sup>; Daniel Serrano, PhD<sup>5</sup>; Charlie Iaconangelo, PhD<sup>5</sup>

1 Albert Einstein College of Medicine, Bronx, NY, USA; 2 Dr. Reddy's Laboratories,  
Princeton, NJ, USA; 3 Mayo Clinic, Scottsdale, AZ, USA; 4 Geisel School of Medicine  
at Dartmouth, Hanover, NH, USA; 5 Pharmerit Inc., Bethesda, MD, USA

## **Participating Study Sites**

IPS Research Company  
1111 North Lee, Suite 400  
Oklahoma City, Oklahoma 73103 United States

Village Health Partners  
5425 West Spring Creek Parkway Suite 200 and 225  
Plano, Texas 75024 United States

Boston Clinical Trials  
26 Cummins Highway  
Boston, Massachusetts 02131 United States

Clinical Research Institute, Inc.  
825 Nicollet Mall, Suite 1135  
Minneapolis, Minnesota 55402 United States

New York Clinical Trials  
59 East 54<sup>th</sup> Street, Suite 93  
New York, New York 10022 United States

WK River Cities Clinical Research Center  
1811 East Bert Kouns Industrial Loop, Suite 301  
Shreveport, Louisiana 71105 United States

Urgent Care Specialists, LLC dba Hometown Urgent Care and Research  
6210 Brandt Pike  
Dayton, Ohio 45424 United States

NRC Research Institute  
1010 West Chapman Avenue  
Orange, California 92868 United States

Axis Clinical Trials  
1636 Wilshire Boulevard, Second Floor  
Los Angeles, California 90017 United States

Clinical Research Advantage, Inc./Primary Care Associates  
2000 East Greenville Street, Suite 1500  
Anderson, South Carolina 29621 United States

Harmony Medical Research Institute, Inc.  
8001 West 26 Avenue, Unit #3  
Hialeah, Florida 33016 United States

Overlea Personal Physicians  
7602 Belair Road  
Baltimore, Maryland 21236 United States

FutureSearch Trials of Neurology  
5508 Parkcrest Drive, Suites 300 & 310  
Austin, Texas 78731 United States

iResearch Atlanta, LLC  
125 Clairemont Avenue, Suite 470  
Decatur, Georgia 30030 United States

Clinical Neuroscience Solutions, Inc.  
5200 Belfort Road, Suite 420  
Jacksonville, Florida 32256 United States

Northwest Clinical Research Center  
1951 152<sup>nd</sup> Place North East, Suite 200  
Bellevue, Washington 98007 United States

Woodland International Research Group, LLC  
910 Autumn Road  
Little Rock, Arkansas 72211 United States

WR-ClinSearch, LLC  
6035 Shallowford Road, Suite 109  
Chattanooga, Tennessee 37421 United States

CA Medical Clinic for Headache  
2001 Santa Monica Boulevard, # 880W  
Santa Monica, California 90404 United States

Colorado Springs Neurological Associates  
2312 North Nevada Avenue, Suite 100  
Colorado Springs, Colorado 80907 United States

Elite Clinical Studies, LLC  
4520 East Indian School Road  
Phoenix, Arizona 85018 United States

CTI Clinical Research Center  
1775 Lexington Avenue, Suite 200  
Cincinnati, Ohio 45212 United States

Artemis Institute for Clinical Research  
770 Washington Street, Suite 300  
San Diego, California 92103 United States

BTC of New Bedford, LLC  
222-230 Field Street  
New Bedford, Massachusetts 02740 United States

Thomas Jefferson University, Jefferson Headache Center  
900 Walnut Street, Suite 200  
Philadelphia, Pennsylvania 19107 United States

Empire Clinical Research  
1060 East Foothill Boulevard, Suite 204  
Upland, California 91786 United States

Integrated Clinical Trial Services, Inc.  
1241 8<sup>th</sup> Street  
West Des Moines, Iowa 50265 United States

Avail Clinical Research, LLC  
860 Peachwood Drive  
DeLand, Florida 32720 United States

Healthcare Research Network  
637 Dunn Road, Suite 135  
Hazelwood, Missouri 63042 United States

Clinvest Research, LLC  
4350 South National Avenue, Suite C 100  
Springfield, Missouri 65810 United States

Southern California Research LLC  
2650 Jones Way, Suite 30  
Simi Valley, California 93065 United States

Phoenix Medical Research, Inc.  
7301 Mission Road, Suite 135  
Prairie Village, Kansas 66208 United States

River Birch Research Alliance, LLC  
101 Riverstone Vista, Suite 201  
Blue Ridge, Georgia 30513 United States

Oregon Center for Clinical Investigations, Inc.  
702 Church Street North East  
Salem, Oregon 97301 United States

BTC of Lincoln, LLC  
640 George Washington Highway Building C, Suite 202  
Lincoln, Rhode Island 02865 United States

Upstate Clinical Research Associates, LLC  
8201 Main Street, Suite 1  
Williamsville, New York 14221 United States

Achieve Clinical Research, LLC  
2017 Canyon Road, Suite 41  
Birmingham, Alabama 35216 United States

Wolfson Medical Center  
6803 West Tropicana Avenue  
Las Vegas, Nevada 89103 United States
